# Supplementary material for: Neuroendocrine Differentiation in Conventional Colorectal Adenocarcinomas: Incidental Finding or Prognostic Biomarker?
Source: MDPI journal article supplement (doi:10.3390/cancers13205111), 2021-10-12
Supplement: s1 [file s1]

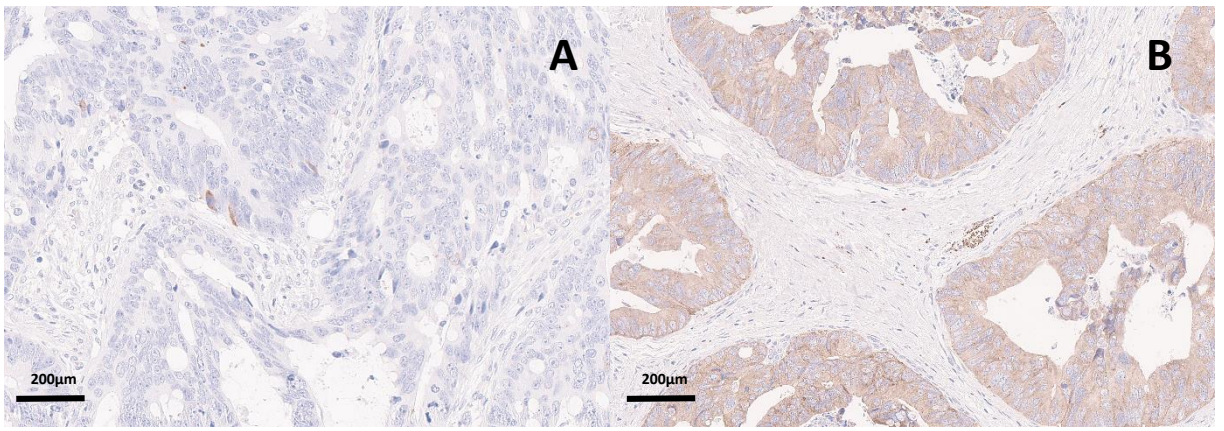

### **Supplementary Figure 1:**

A: Conventional colorectal carcinoma with a scattered, discontinuous expression of Synaptophysin (20x) in only a few cells.

B: Block like expression of Synaptophysin in a conventional colorectal carcinoma (20x) with more than 50 cells that are continuously positive.
